# Supplementary material for: Subtilomycin: A New Lantibiotic from Bacillus subtilis Strain MMA7 Isolated from the Marine Sponge Haliclona simulans
Source: Mar Drugs. 2013 Jun 3;11(6):1878–98. doi: 10.3390/md11061878 (PMC3721211; doi:10.3390/md11061878)
Supplement: Supplementary File 1 — Supplementary Information (PDF, 216 KB) [file marinedrugs-11-01878-s001.pdf]

# Supplementary Information

**Table S1.** Bacterial strains used in this study.

| Bacterial strains                                   | Growth media <sup>a</sup> /Origin <sup>b</sup> |
|-----------------------------------------------------|------------------------------------------------|
| Marine sponge <i>Bacillus subtilis</i> : BD126-43   | MA, MB/This work                               |
| BD230-19                                            | MA, MB/This work                               |
| BD230-27                                            | MA, MB/This work                               |
| BD230-29                                            | MA, MB/This work                               |
| BD243-3                                             | MA, MB/This work                               |
| CC15                                                | MA, MB/This work                               |
| AF31                                                | MA, MB/This work                               |
| MMA7                                                | MA, MB/[1]                                     |
| <i>Bacillus subtilis</i> NCDO 1769                  | LB/MDCC UCC                                    |
| <i>Bacillus subtilis</i> NRRL B-23052 <sup>T</sup>  | LB/BGSC                                        |
| <i>Bacillus subtilis</i> 168                        | LB/BGSC                                        |
| <i>Bacillus subtilis</i> DSM 347                    | LB/DSMZ                                        |
| <i>Bacillus cereus</i> NCIMB 9373                   | LB/MDCC UCC                                    |
| <i>Bacillus megaterium</i> ATCC 19213 (BGSC 7A2)    | LB/BGSC                                        |
| <i>Staphylococcus aureus</i> NCDO 949               | BHI/MDCC UCC                                   |
| MRSA ST 530                                         | BHI/MDCC UCC                                   |
| VISA22784                                           | BHI/MDCC UCC                                   |
| hVISA 35197                                         | BHI/MDCC UCC                                   |
| VRE EC725                                           | BHI/MDCC UCC                                   |
| <i>Enterococcus faecium</i> NCIMB 11508             | BHI/MDCC UCC                                   |
| <i>Listeria innocua</i> DPC 3567                    | BHI/MDCC UCC                                   |
| <i>Listeria monocytogenes</i> EGDe                  | BHI/MDCCUCC                                    |
| <i>Clostridium perfringens</i> NCDO 1799            | TGB/MDCC UCC                                   |
| <i>Clostridium sporogenes</i> NCDO 1791             | TGB/MDCC UCC                                   |
| <i>Clostridium difficile</i> 001                    | BHI/MDCC UCC                                   |
| <i>Carnobacterium malteromaticum</i> LMG 9839       | TSB/BCCM <sup>TM</sup> /LMG BC                 |
| <i>Lactococcus lactis</i> subsp. <i>cremoris</i> HP | GM17/MDCC UCC                                  |
| <i>Escherichia coli</i> NCIMB 15943                 | LB/MDCC UCC                                    |
| <i>Escherichia coli</i> MUH 103                     | LB/[2]                                         |
| <i>Enterobacter aerogenes</i> NCIMB 10102           | LB/MDCC UCC                                    |
| <i>Salmonella</i> Typhimurium LT2                   | LB/MDCC UCC                                    |
| <i>Pseudomonas aeruginosa</i> PAO1                  | LB/MDCC UCC                                    |
| <i>Burkholderia cenocepacia</i> J2315               | LB/[3]                                         |
| <i>Stenotrophomonas maltophilia</i> K279A           | LB/[4]                                         |
| <i>Klebsiella pneumoniae</i> MUH 588                | LB/[2]                                         |
| <i>Serratia marcescens</i> MUH 436                  | LB/[2]                                         |
| <i>Morganella morganii</i> MUH 988                  | LB/[2]                                         |
| <i>Aeromonas hydrophila</i> LMG 2844                | TSB(NA)/BCCM <sup>TM</sup> /LMG BC             |
| <i>Listonella (Vibrio) anguillarum</i> LMG 4410     | MB/DSMZ                                        |
| <i>Candida glabrata</i>                             | YPD/MDCC UCC                                   |
| <i>Candida albicans</i> SC5314                      | YPD/MDCC UCC                                   |
| <i>Candida dubliniensis</i>                         | YPD/MDCC UCC                                   |
| <i>Candida lusitanae</i>                            | YPD/MDCC UCC                                   |
| <i>Candida parapsilosis</i>                         | YPD/MDCC UCC                                   |

<sup>a</sup> Standard media were: LB, Luria Bertani; TGB, Thioglycolate broth (Merck); YPD, Yeast extract peptone dextrose media; BHI, Brain heart infusion (Merck); MA, Marine Agar; MB, Marine broth (Difco); TSB, Tryptic soya broth (Merck); NA, Nutrient agar (Difco); GM17, M17 broth (Merck) supplemented with

Glucose 0.5%; <sup>b</sup> Bacterial strains were obtained from the Microbiology Department Culture Collection, University College Cork (MDCC UCC), the *Bacillus* Genetic Stock Centre (BGSC), Belgium Coordinated Collections of Microorganisms (BCCM<sup>TM</sup>)/LGM Bacteria Collection and DSMZ, DSM Collection, Deutsche Sammlung von Mikroorganismen und Zellkulturen GmbH, Braunschweig, Germany. MRSA, methicillin resistant *Staphylococcus aureus*; VISA, vancomycin intermediate *Staphylococcus aureus*; hVISA, heterogeneous VISA, and VRE, vancomycin resistant enterococci.

**Table S2.** Oligonucleotide primers used in this study.

| Primer                                                              | Sequence (5'-3') *               | Annealing ( °C) |
|---------------------------------------------------------------------|----------------------------------|-----------------|
| <u>Construction of MMA7 <math>\Delta</math>sbo-albF::cat mutant</u> |                                  |                 |
| sboUp-F (HindIII)                                                   | CCCAAGCTTCCATCATTGCTCATCAGATTTGA | 58              |
| sbo-R (BamHI)                                                       | CGCGGATCCTCCGATCGAGCATGTTGCACAA  |                 |
| albF-F (EcoRI)                                                      | CCGGAATTCCATCCTGCTTGATGCGTTATGGA | 52              |
| albF-R (XhoI)                                                       | CCGCTCGAGGTGTCTTCTGAGCCTCCGATCAA |                 |
| <u>Verification of MMA7 <math>\Delta</math>sbo-albF::cat mutant</u> |                                  |                 |
| ywiB-F                                                              | CACATGGAGTGTTATCGGTG             | 52              |
| albFDown-R                                                          | CTGTAATCCGGTCCATGTGT             | 52              |
| albA-R2                                                             | TGCCACAGTTTATGGACGAGAGG          | 52              |
| albD-F                                                              | GCAGACAGAGCAGCAGCTCTGGA          | 52              |
| cat255-R                                                            | CGTTTGTGAACTAATGGGTG             | 52              |
| cat958-D <sup>#</sup>                                               | GGGTAAGTAGCCTGCAGGCAATAGTTACCC   | 52              |
| <u>Bacteriocins screening primers</u>                               |                                  |                 |
| <u>Subtilin</u>                                                     |                                  |                 |
| spaC-F                                                              | ACTATGAATCAATGGAAGG              | 48              |
| spaS-R                                                              | TTGCAGTTACAAGTTAGTG              |                 |
| <u>Sublancin</u>                                                    |                                  |                 |
| sublancin-F                                                         | GTGTGCTGCGTTGCTACAA              | 55              |
| sublancin-R                                                         | TTGACGAGATACAAGCTAGTCC           |                 |
| <u>Subtilosin</u>                                                   |                                  |                 |
| Sbo-F                                                               | GGTTGTGCAACATGCTCGAT             | 52              |
| AlbA-R                                                              | CTCAGGAAGCTGGTGAAGTC             |                 |
| <u>Subtilomycin</u>                                                 |                                  |                 |
| subA2569-F                                                          | TGCGGATGACAGATTCGTATTGC          | 60              |
| subA2571-R                                                          | ACAGCTGTACCGTGCCCATATAGA         |                 |

\* Introduced restriction sites are underlined; Cat, chloramphenicol resistance cassette; <sup>#</sup> [5].

**Table S3.** Sequence homology of the proteins encoded by the subtilomycin biosynthetic gene cluster \*.

| Protein | No. aa | Closest homologue                                                             | % Identity/<br>(Aligned region aa) | E Value # |
|---------|--------|-------------------------------------------------------------------------------|------------------------------------|-----------|
| SubA    | 56     | <i>Bacillus thuringiensis</i> serovar <i>thuringiensis</i> str. T01001.       | 56% (28/50)                        | 3E-07     |
| SubP    | 324    | <i>Bacillus amyloliquefaciens</i> DSM 7 subtilisin-type proteinase            | 34% (113/333)                      | 6E-44     |
| SubB    | 1045   | <i>Paenibacillus polymyxa</i> E681 lantibiotic biosynthesis protein SpaB      | 31% (336/1075)                     | 6E-144    |
| SubC    | 440    | <i>Bacillus thuringiensis</i> IBL 200 Lantibiotic biosynthesis protein        | 44% (185/424)                      | 8E-109    |
| SubI    | 80     | <i>Lactococcus</i> phage BK5-T hypothetical protein                           | 31% (16/51)                        | 1.3       |
| SubT    | 585    | <i>Staphylococcus epidermidis</i> VCU121 ABC transporter, ATP-binding protein | 45% (258/573)                      | 0.0       |

\* Results are from a BLASTp search of the GenBank protein database on 17/04/2013; # Expectation value.

**Figure S1.** Mass spectrometry analysis of RP-HPLC purified peptide showing a number of oxidised forms typical of the thioethers found in lantibiotics.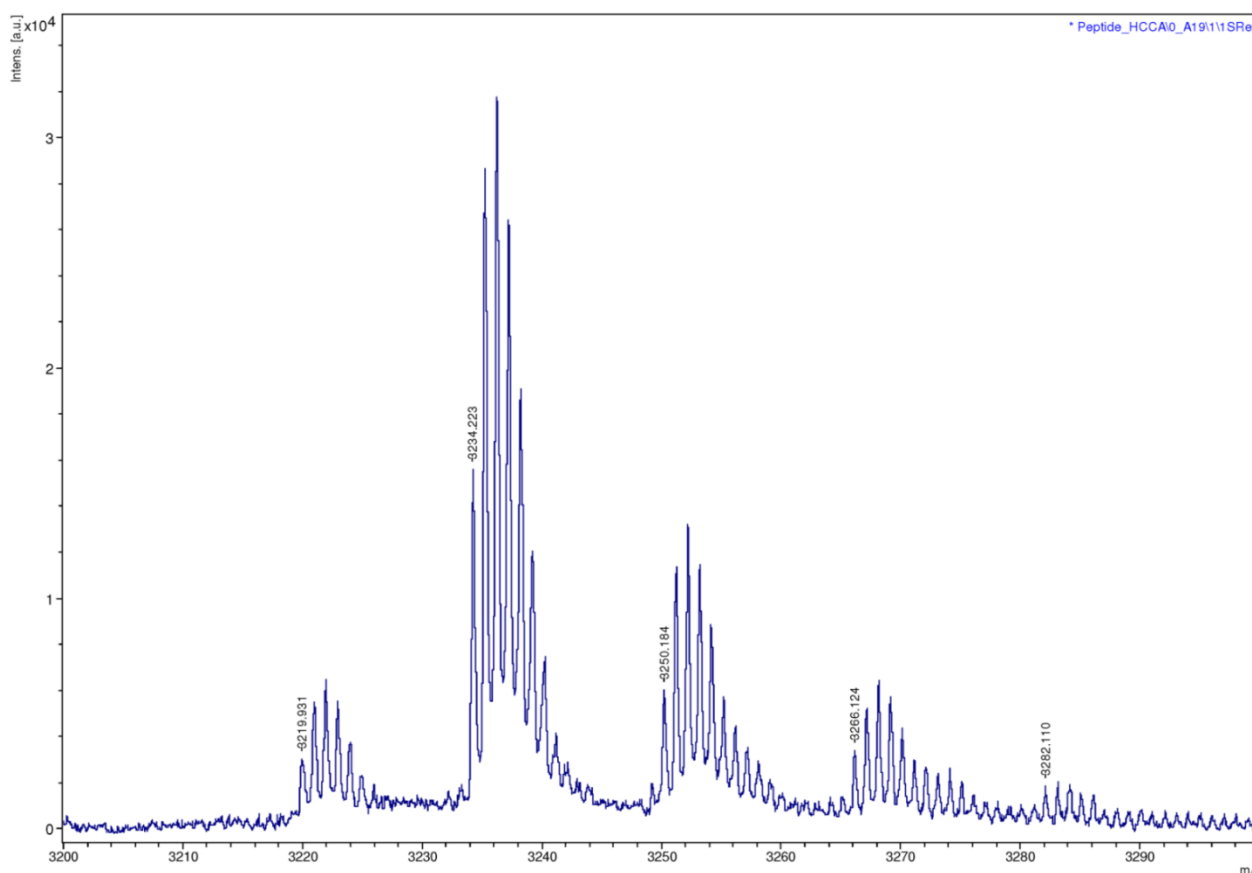

## References

1. Phelan, R.W.; O'Halloran, J.A.; Kennedy, J.; Morrissey, J.P.; Dobson, A.D.; O'Gara, F.; Barbosa, T.M. Diversity and bioactive potential of endospore-forming bacteria cultured from the marine sponge *Haliclona simulans*. *J. Appl. Microbiol.* **2012**, *112*, 65–78.
2. Mac Aogain, M.; Mooij, M.J.; Adams, C.; Clair, J.; O'Gara, F. Emergence of extended-spectrum beta-lactamase and fluoroquinolone resistance genes among Irish multidrug-resistant isolates. *Diagn. Microbiol. Infect. Dis.* **2010**, *67*, 106–109.
3. Holden, M.T.; Seth-Smith, H.M.; Crossman, L.C.; Sebahia, M.; Bentley, S.D.; Cerdeno-Tarraga, A.M.; Thomson, N.R.; Bason, N.; Quail, M.A.; Sharp, S. The genome of *Burkholderia cenocepacia* J2315, an epidemic pathogen of cystic fibrosis patients. *J. Bacteriol.* **2009**, *191*, 261–277.
4. Crossman, L.C.; Gould, V.C.; Dow, J.M.; Vernikos, G.S.; Okazaki, A.; Sebahia, M.; Saunders, D.; Arrowsmith, C.; Carver, T.; Peters, N. The complete genome, comparative and functional analysis of *Stenotrophomonas maltophilia* reveals an organism heavily shielded by drug resistance determinants. *Genome Biol.* **2008**, *9*, R74.
5. Zilhao, R.; Serrano, M.; Istatico, R.; Ricca, E.; Moran, C.P.; Henriques, A.O. Interactions among CotB, CotG, and CotH during assembly of the *Bacillus subtilis* spore coat. *J. Bacteriol.* **2004**, *186*, 1110–1119.

© 2013 by the authors; licensee MDPI, Basel, Switzerland. This article is an open access article distributed under the terms and conditions of the Creative Commons Attribution license (<http://creativecommons.org/licenses/by/3.0/>).
